# Supplementary material for: A family of Zn(ii)/Cd(ii) halide systems incorporating 5,5′-di(pyridin-2-yl)-3,3′-bi(1,2,4-triazole)
Source: Royal Society of Chemistry journal article supplement (doi:10.1039/c5ce02236c), 2015-12-30
Supplement: c5ce02236c1.pdf [file c5ce02236c1.pdf]

## Supporting Information

**Table S1. Selected Atomic Distances (Å) and Bond Angles (°) for complexes 1-6**

|                                                                                                  |             |             |             |
|--------------------------------------------------------------------------------------------------|-------------|-------------|-------------|
| <b>1</b>                                                                                         |             |             |             |
| Zn1—Cl1                                                                                          | 2.2016 (16) | Zn2—N9      | 2.188 (4)   |
| Zn1—Cl2                                                                                          | 2.2380 (15) | Zn2—N10     | 2.034 (4)   |
| Zn1—N5                                                                                           | 2.051 (3)   | Zn3—Cl3     | 2.2390 (14) |
| Zn1—N8                                                                                           | 2.106 (4)   | Zn3—Cl4     | 2.1769 (15) |
| Zn2—O1                                                                                           | 1.982 (3)   | Zn3—N13     | 2.048 (4)   |
| Zn2—N1                                                                                           | 2.189 (4)   | Zn3—N16     | 2.142 (4)   |
| Zn2—N3                                                                                           | 2.031 (4)   |             |             |
| Cl1—Zn1—Cl2                                                                                      | 110.72 (6)  | N3—Zn2—N9   | 96.75 (15)  |
| N5—Zn1—Cl1                                                                                       | 127.01 (12) | N3—Zn2—N10  | 142.66 (16) |
| N5—Zn1—Cl2                                                                                       | 112.88 (11) | N9—Zn2—N1   | 161.03 (15) |
| N5—Zn1—N8                                                                                        | 80.47 (16)  | N10—Zn2—N1  | 94.54 (14)  |
| N8—Zn1—Cl1                                                                                       | 106.75 (13) | N10—Zn2—N9  | 78.02 (15)  |
| N8—Zn1—Cl2                                                                                       | 114.90 (13) | Cl4—Zn3—Cl3 | 116.26 (6)  |
| O1—Zn2—N1                                                                                        | 97.02 (14)  | N13—Zn3—Cl3 | 112.60 (12) |
| O1—Zn2—N3                                                                                        | 106.45 (16) | N13—Zn3—Cl4 | 124.18 (12) |
| O1—Zn2—N9                                                                                        | 101.94 (14) | N13—Zn3—N16 | 79.90 (15)  |
| O1—Zn2—N10                                                                                       | 110.81 (16) | N16—Zn3—Cl3 | 108.40 (12) |
| N3—Zn2—N1                                                                                        | 78.49 (14)  | N16—Zn3—Cl4 | 107.71 (13) |
| <b>2</b> (Symmetry codes: (A) $x, -y+3/2, -z+1$ ; (B) $x, y, -z+1/2$ .)                          |             |             |             |
| Zn1—Cl1                                                                                          | 2.228 (3)   | Zn2—Cl2     | 2.207 (2)   |
| Zn1—N1                                                                                           | 2.273 (4)   | Zn2—Cl3     | 2.201 (2)   |
| Zn1—N2                                                                                           | 2.022 (3)   | Zn2—N4      | 2.050 (3)   |
| Cl1—Zn1—N1A                                                                                      | 105.60 (11) | N2i—Zn1—N1  | 93.58 (14)  |
| Cl1—Zn1—N1                                                                                       | 105.60 (11) | N2—Zn1—N2A  | 142.0 (3)   |
| N1—Zn1—N1A                                                                                       | 148.8 (2)   | Cl3—Zn2—Cl2 | 114.74 (9)  |
| N2A—Zn1—Cl1                                                                                      | 109.02 (13) | N4B—Zn2—Cl2 | 113.42 (12) |
| N2—Zn1—Cl1                                                                                       | 109.02 (13) | N4—Zn2—Cl2  | 113.42 (12) |
| N2A—Zn1—N1A                                                                                      | 76.25 (13)  | N4B—Zn2—Cl3 | 114.18 (11) |
| N2—Zn1—N1A                                                                                       | 93.58 (14)  | N4—Zn2—Cl3  | 114.18 (11) |
| N2—Zn1—N1                                                                                        | 76.25 (13)  | N4—Zn2—N4B  | 83.09 (19)  |
| <b>3</b> (Symmetry codes: (A) $y, -x+y, -z$ ; (B) $x-y, x, -z$ ; (C) $-x+2/3, -y+1/3, -z+1/3$ .) |             |             |             |
| Cd1—Cl1A                                                                                         | 2.6318 (18) | Cd1—N2      | 2.200 (4)   |
| Cd1—Cl1                                                                                          | 2.5247 (18) | Cd1—N4      | 2.502 (5)   |
| Cd1—N1B                                                                                          | 2.199 (5)   | Cd1A—N5C    | 3.116 (9)   |
| N1B—Cd1—Cl1                                                                                      | 92.69 (12)  | N2—Cd1—Cl1A | 88.03 (12)  |
| N1B—Cd1—Cl1A                                                                                     | 95.98 (15)  | N2—Cd1—N4   | 69.03 (16)  |
| N1B—Cd1—N2                                                                                       | 150.58 (17) | N4—Cd1—Cl1  | 100.25 (14) |
| N1B—Cd1—N4                                                                                       | 97.79 (18)  | N4—Cd1—Cl1A | 153.33 (13) |

|                                                                                                      |             |             |             |
|------------------------------------------------------------------------------------------------------|-------------|-------------|-------------|
| N2—Cd1—Cl1                                                                                           | 115.06 (14) |             |             |
| <b>4</b> (Symmetry codes: (A) $y+1/3, -x+y+2/3, -z+2/3$ ; (B) $x-y+1/3, x-1/3, -z+2/3$ .)            |             |             |             |
| Cd1—N3C                                                                                              | 3.1541 (2)  | Cd1—N1      | 2.246 (6)   |
| I1—Cd1                                                                                               | 2.8342 (9)  | Cd1—N2B     | 2.233 (6)   |
| Cd1—I1B                                                                                              | 2.9099 (9)  | Cd1—N4B     | 2.476 (7)   |
| I1—Cd1—I1B                                                                                           | 100.47 (3)  | N2B—Cd1—I1  | 110.79 (18) |
| N1—Cd1—I1                                                                                            | 96.64 (16)  | N2B—Cd1—N1  | 149.2 (2)   |
| N1—Cd1—I1B                                                                                           | 97.13 (18)  | N2B—Cd1—N4B | 69.4 (2)    |
| N1—Cd1—N4B                                                                                           | 93.1 (2)    | N4B—Cd1—I1B | 156.21 (18) |
| N2B—Cd1—I1B                                                                                          | 91.53 (17)  | N4B—Cd1—I1  | 99.63 (19)  |
| <b>5</b> (Symmetry codes: (A) $-x+1, -y, -z$ ; (B) $x, -y+1/2, z-1/2$ ; (C) $-x+1, y-1/2, -z+1/2$ .) |             |             |             |
| Cd1—Br1A                                                                                             | 2.7153 (15) | Cd1—N4B     | 2.447 (9)   |
| Cd1—Br1                                                                                              | 2.6869 (15) | Cd1—N5      | 2.511 (8)   |
| Cd1—N3                                                                                               | 2.348 (8)   | Cd1—N6B     | 2.362 (8)   |
| Cd2—Br2                                                                                              | 2.576 (2)   | Cd2—N2      | 2.307 (8)   |
| Cd2—O1                                                                                               | 2.6582(5)   | Cd2—N7C     | 2.310 (8)   |
| Cd2—N1                                                                                               | 2.400 (9)   | Cd2—N8C     | 2.453 (9)   |
| Br1—Cd1—Br1A                                                                                         | 94.52 (5)   | Br2—Cd2—H2  | 164.7       |
| N3—Cd1—Br1                                                                                           | 101.5 (2)   | N1—Cd2—Br2  | 92.1 (3)    |
| N3—Cd1—Br1A                                                                                          | 92.3 (2)    | N1—Cd2—H2   | 72.7        |
| N3—Cd1—N4B                                                                                           | 91.4 (3)    | N1—Cd2—N8C  | 93.5 (3)    |
| N3—Cd1—N5                                                                                            | 72.8 (3)    | N2—Cd2—Br2  | 116.4 (2)   |
| N3—Cd1—N6B                                                                                           | 158.5 (3)   | N2—Cd2—H2   | 60.5        |
| N4B—Cd1—Br1A                                                                                         | 94.3 (2)    | N2—Cd2—N1   | 71.7 (3)    |
| N4B—Cd1—Br1                                                                                          | 164.0 (2)   | N2—Cd2—N7C  | 111.4 (3)   |
| N4B—Cd1—N5                                                                                           | 79.5 (3)    | N2—Cd2—N8C  | 146.0 (3)   |
| N5—Cd1—Br1A                                                                                          | 163.61 (19) | N7C—Cd2—Br2 | 104.8 (2)   |
| N5—Cd1—Br1                                                                                           | 95.2 (2)    | N7C—Cd2—H2  | 89.8        |
| N6B—Cd1—Br1                                                                                          | 92.3 (2)    | N7C—Cd2—N1  | 158.1 (4)   |
| N6B—Cd1—Br1A                                                                                         | 103.0 (2)   | N7C—Cd2—N8C | 71.8 (3)    |
| N6B—Cd1—N4B                                                                                          | 72.7 (3)    | N8C—Cd2—Br2 | 94.0 (2)    |
| N6B—Cd1—N5                                                                                           | 89.7 (3)    | N8C—Cd2—H2  | 86.1        |
| <b>6</b> (Symmetry codes: (A) $x+1, y, z$ ; (B) $x-1, y, z$ ; (C) $-x, -y+2, -z+1$ .)                |             |             |             |
| I1—Cd1                                                                                               | 3.0994 (12) | I1—Cd2      | 2.8582 (11) |
| I2—Cd1                                                                                               | 2.9358 (12) | I3—Cd2      | 3.1055 (14) |
| I3—Cd1                                                                                               | 2.7574 (13) | I4—Cd2      | 2.8515 (11) |
| Cd1—I4A                                                                                              | 3.0455 (12) | Cd2—I2B     | 3.0045 (12) |
| Cd1—N1                                                                                               | 2.314 (9)   | Cd2—N7C     | 2.443 (9)   |
| Cd1—N2                                                                                               | 2.519 (9)   | Cd2—N8C     | 2.341 (9)   |
| I2—Cd1—I1                                                                                            | 90.72 (3)   | I1—Cd2—I2B  | 93.44 (3)   |
| I2—Cd1—I4A                                                                                           | 90.42 (3)   | I1—Cd2—I3   | 90.13 (3)   |
| I3—Cd1—I1                                                                                            | 92.16 (4)   | I2B—Cd2—I3  | 167.03 (4)  |
| I3—Cd1—I2                                                                                            | 93.14 (4)   | I4—Cd2—I1   | 97.17 (4)   |
| I3—Cd1—I4A                                                                                           | 99.39 (4)   | I4—Cd2—I2B  | 92.90 (3)   |

|            |            |             |            |
|------------|------------|-------------|------------|
| I4A—Cd1—I1 | 168.32 (4) | I4—Cd2—I3   | 99.03 (4)  |
| N1—Cd1—I1  | 82.6 (2)   | N7C—Cd2—I1  | 168.4 (2)  |
| N1—Cd1—I2  | 98.5 (2)   | N7C—Cd2—I2B | 91.7 (2)   |
| N1—Cd1—I3  | 167.2 (2)  | N7C—Cd2—I3  | 82.7 (2)   |
| N1—Cd1—I4A | 85.7 (2)   | N7C—Cd2—I4  | 93.0 (2)   |
| N1—Cd1—N2  | 71.4 (3)   | N8C—Cd2—I1  | 100.3 (2)  |
| N2—Cd1—I1  | 91.7 (2)   | N8C—Cd2—I2B | 87.1 (2)   |
| N2—Cd1—I2  | 169.2 (2)  | N8C—Cd2—I3  | 80.0 (2)   |
| N2—Cd1—I3  | 97.3 (2)   | N8C—Cd2—I4  | 162.5 (2)  |
| N2—Cd1—I4A | 85.1 (2)   | N8C—Cd2—N7C | 69.6 (3)   |
| I2—Cd1—I1  | 90.72 (3)  | I1—Cd2—I2B  | 93.44 (3)  |
| I2—Cd1—I4A | 90.42 (3)  | I1—Cd2—I3   | 90.13 (3)  |
| I3—Cd1—I1  | 92.16 (4)  | I2B—Cd2—I3  | 167.03 (4) |
| I3—Cd1—I2  | 93.14 (4)  | I4—Cd2—I1   | 97.17 (4)  |
| I3—Cd1—I4A | 99.39 (4)  | I4—Cd2—I2B  | 92.90 (3)  |
| I4A—Cd1—I1 | 168.32 (4) | I4—Cd2—I3   | 99.03 (4)  |

**Table S2 Hydrogen bond lengths and bond angles in complex 1, 5 and 6**

| <i>D</i> —H··· <i>A</i>                                                                                           | <i>D</i> —H | H··· <i>A</i> | <i>D</i> ··· <i>A</i> | <i>D</i> —H··· <i>A</i> |
|-------------------------------------------------------------------------------------------------------------------|-------------|---------------|-----------------------|-------------------------|
| <b>1</b>                                                                                                          |             |               |                       |                         |
| O(1)—H(1A)···N(2) #1                                                                                              | 0.83 (5)    | 2.10 (5)      | 2.871 (6)             | 155 (5)                 |
| O(1)—H(1B)···N(12) #2                                                                                             | 0.85 (5)    | 1.95 (5)      | 2.766 (6)             | 161 (5)                 |
| N(6)—H(6)···Cl(2) #3                                                                                              | 0.87 (4)    | 2.37 (4)      | 3.208 (4)             | 161 (4)                 |
| N(15)—H(15)···Cl(3) #4                                                                                            | 0.78 (4)    | 2.44 (5)      | 3.163 (4)             | 155 (5)                 |
| C(3)—H(3)···Cl(1) #1                                                                                              | 0.94 (4)    | 2.80 (5)      | 3.478 (6)             | 131 (4)                 |
| Symmetry codes: (#1) $-x+1, -y, -z+1$ ; (#2) $-x+1, -y+1, -z+1$ ; (#3) $-x, -y, -z+1$ ; (#4) $-x+1, -y+1, -z+2$ . |             |               |                       |                         |
| <b>5</b>                                                                                                          |             |               |                       |                         |
| O(1)—H(1A)···Br(1) #3                                                                                             | 0.85        | 2.64          | 3.435 (11)            | 157                     |
| O(1)—H(1B)···N(6) #1                                                                                              | 0.85        | 2.43          | 3.229 (14)            | 157                     |
| C(12)—H(12)···Br(2) #2                                                                                            | 0.93        | 2.89          | 3.695 (14)            | 145                     |
| Symmetry codes: (#1) $x, -y+1/2, z+1/2$ ; (#2) $-x+1, y+1/2, -z+1/2$ ; (#3) $-x+1, y+1/2, -z+3/2$ .               |             |               |                       |                         |
| <b>6</b>                                                                                                          |             |               |                       |                         |
| N(4)—H(4)···I(4) #1                                                                                               | 0.86        | 2.80          | 3.611 (10)            | 158                     |
| N(6)—H(6)···I(3)                                                                                                  | 0.86        | 2.62          | 3.454 (9)             | 163                     |
| Symmetry code: (#1) $-x, -y+1, -z+1$ .                                                                            |             |               |                       |                         |

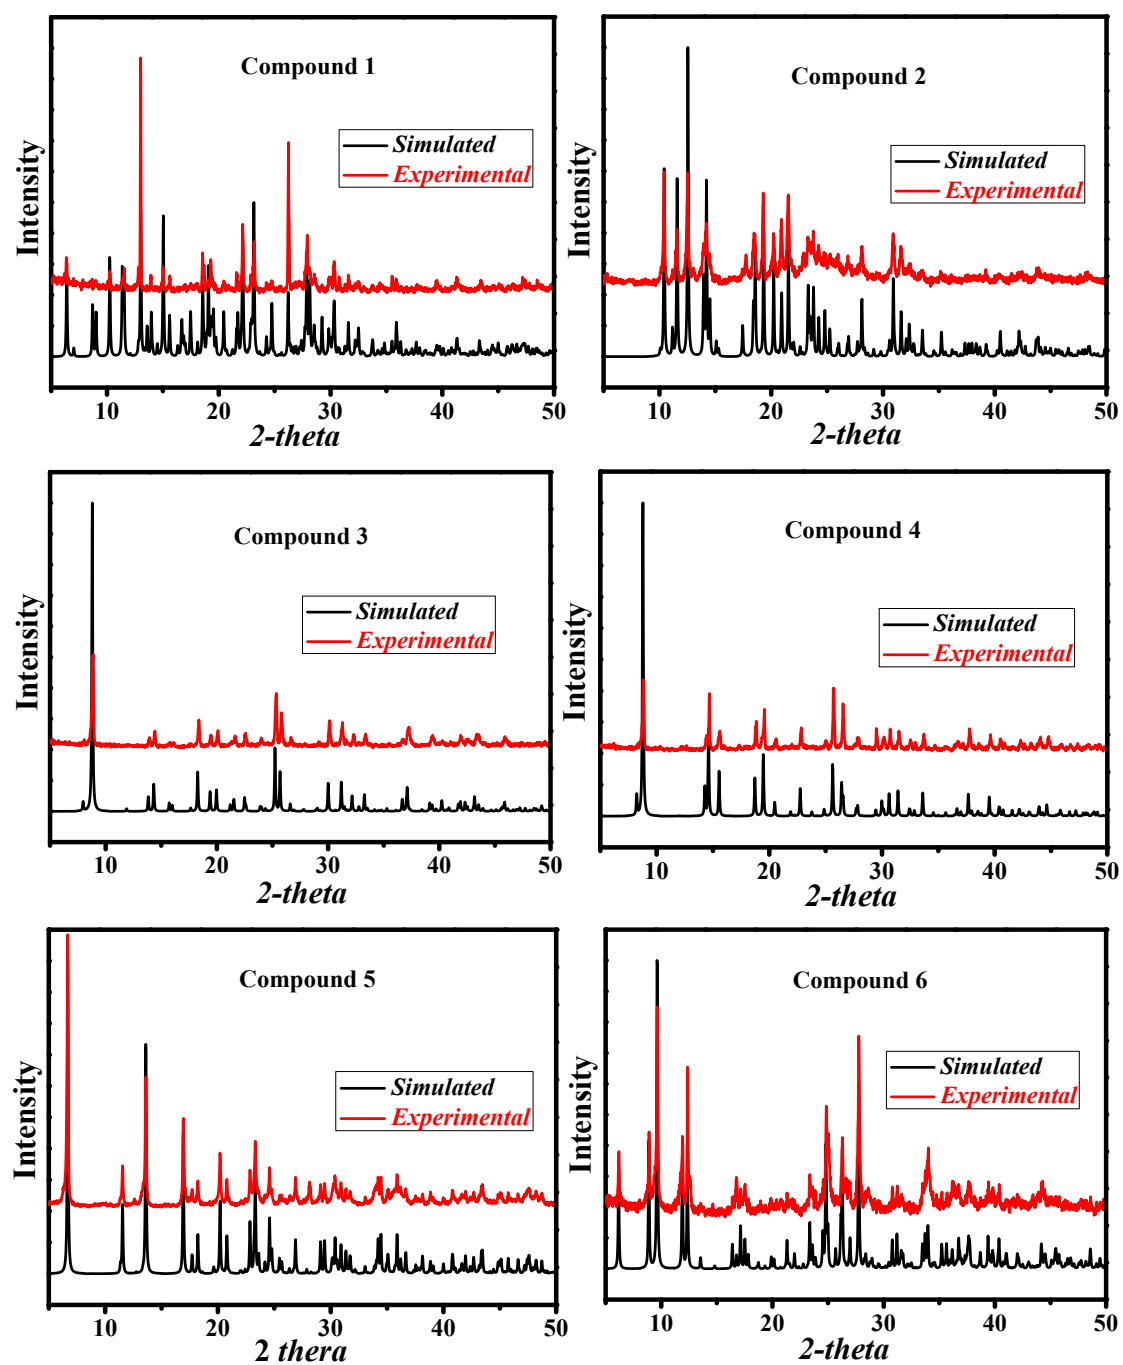

Fig S1 Measured and calculated powder X-ray diffraction (PXRD) pattern of 1- 6.

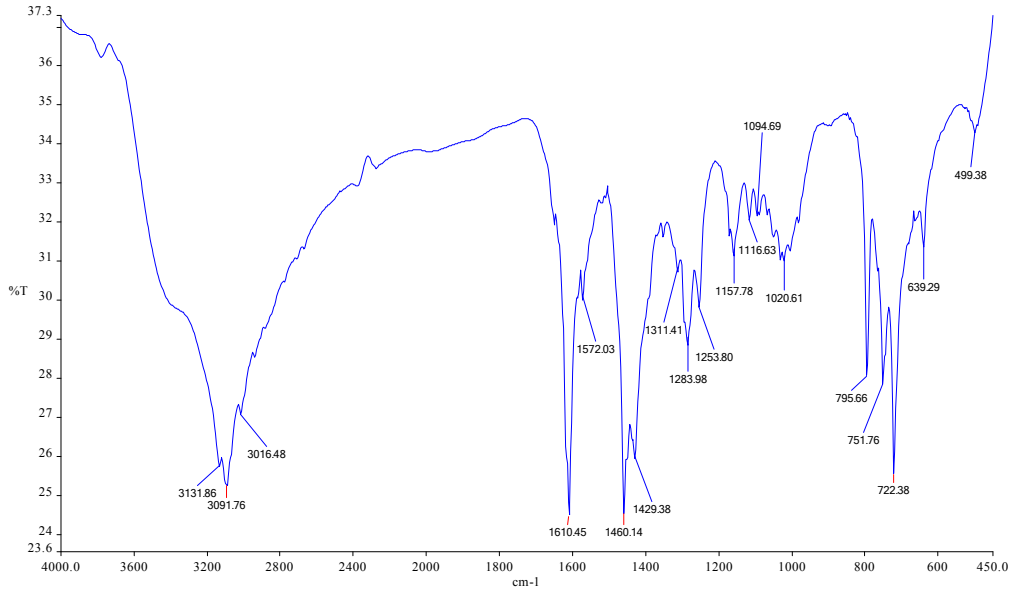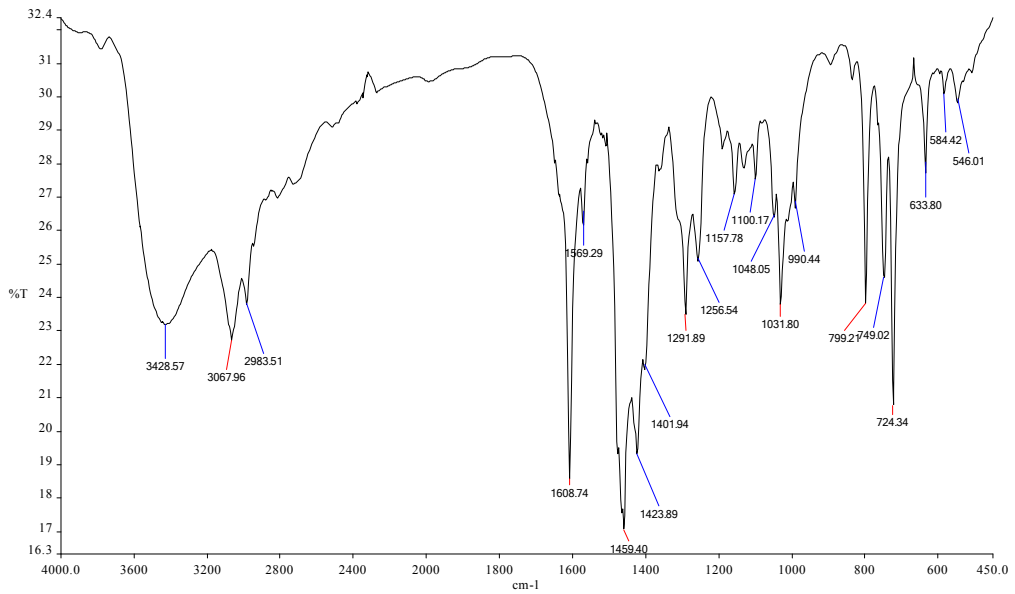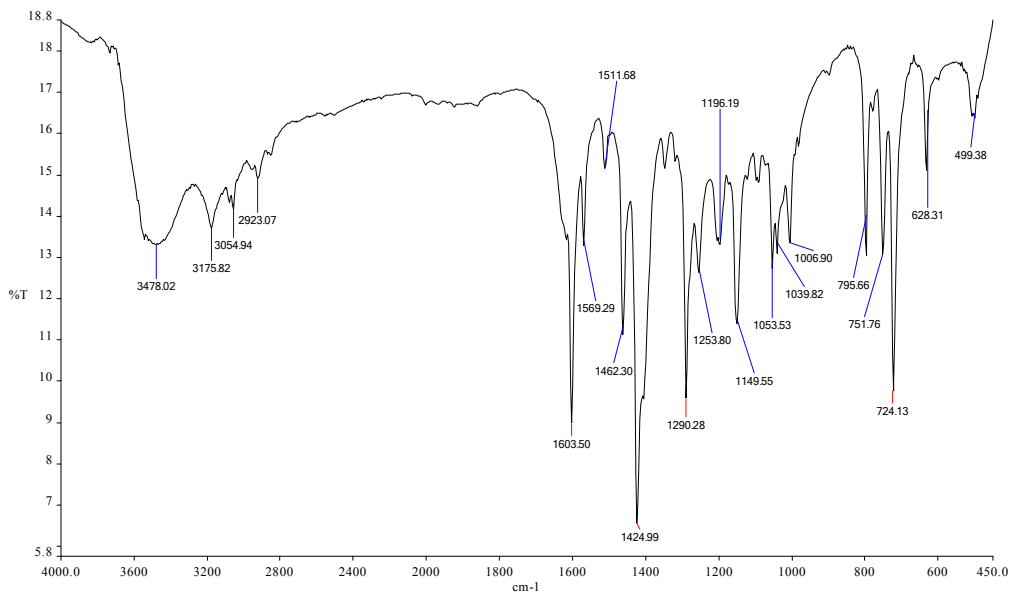

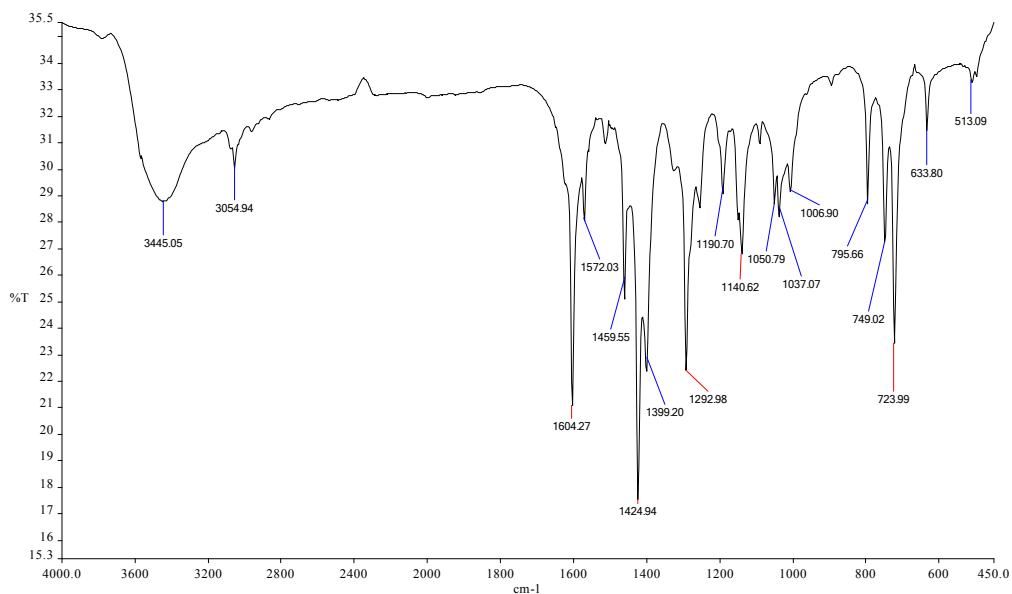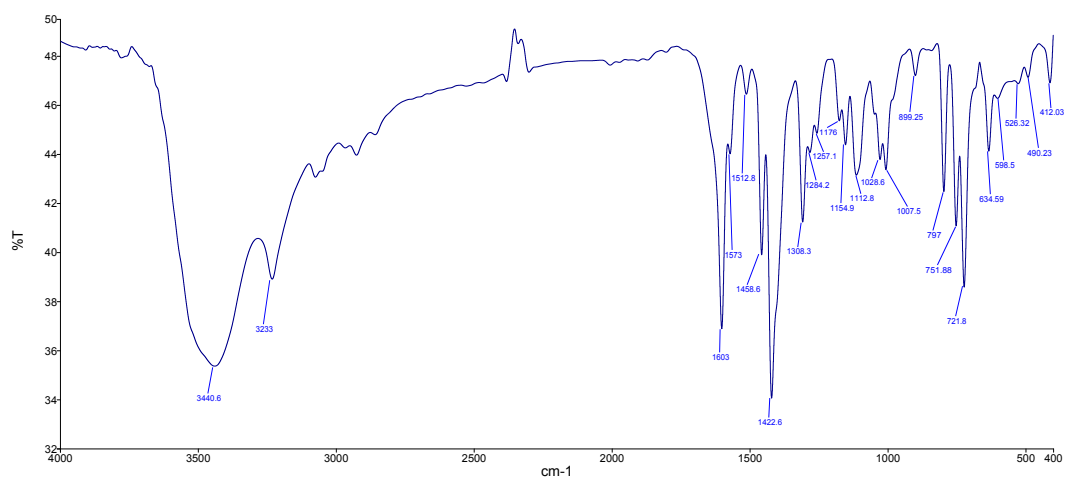

名称 说明  
 20150918-ypf1437-hk24\_1\_1 样品 616 用户 Administrator 日期 星期五, 九月 18 2015

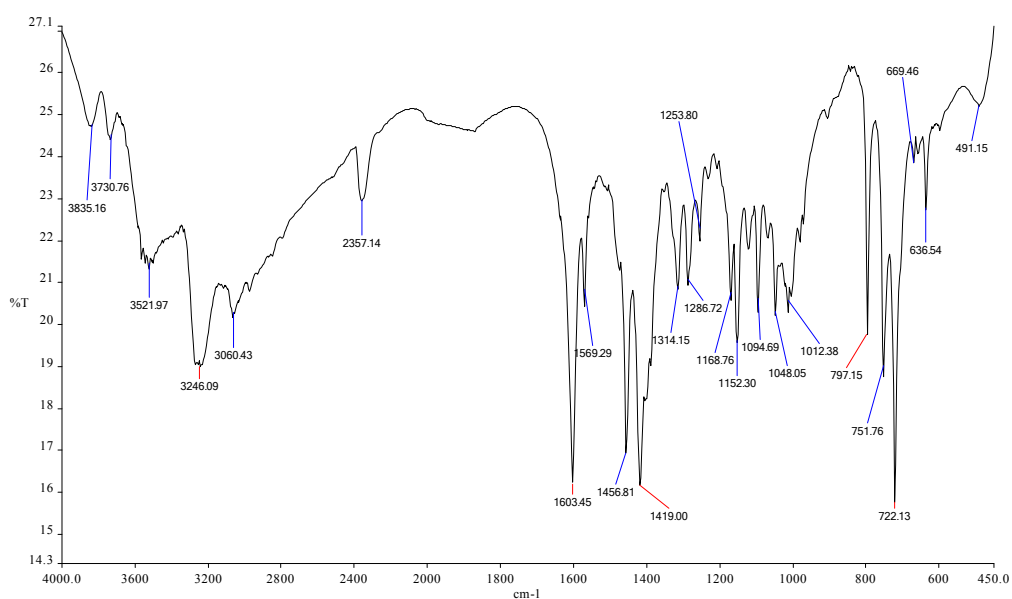

Fig S2 The IR curves for complexes 1- 6.

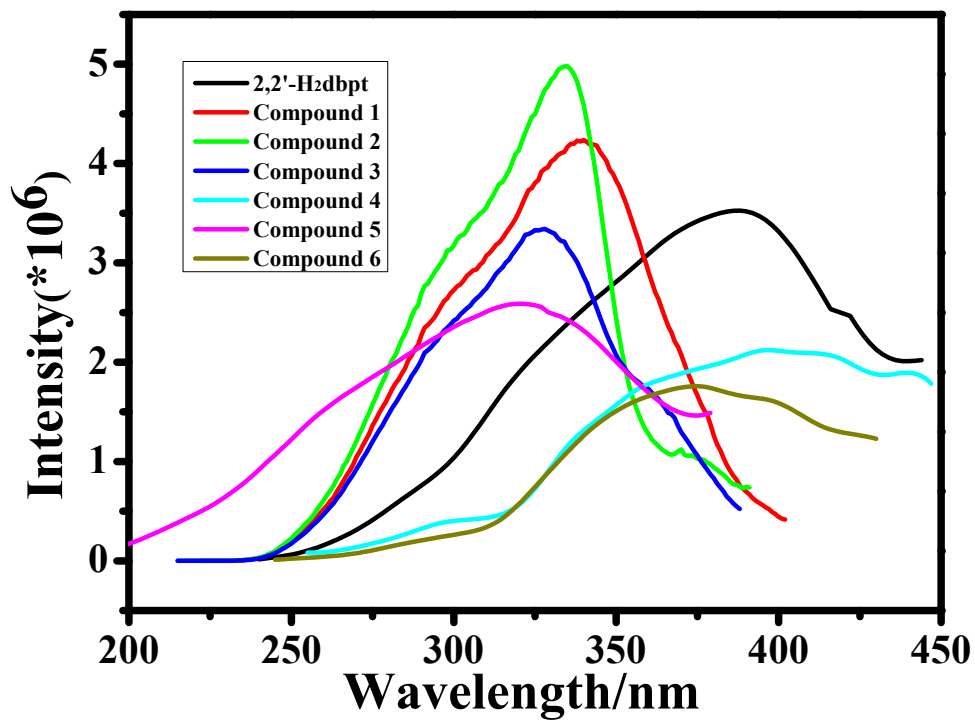

Fig S3 The excited band of 1-6 as well as the free ligand 2,2'- H<sub>2</sub>dbpt.

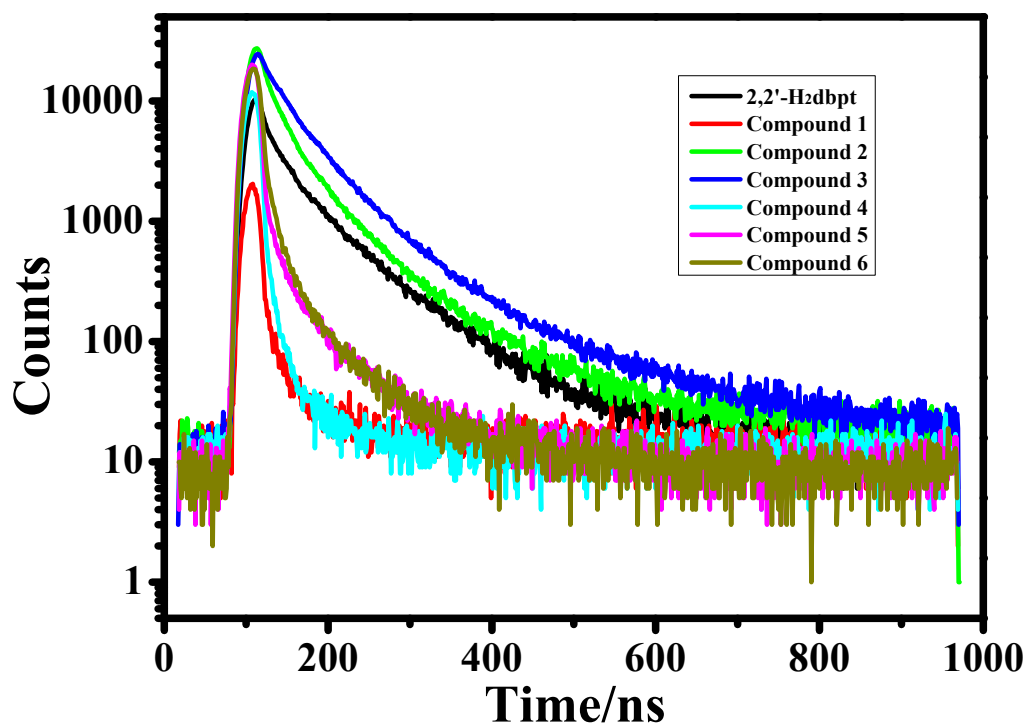

Fig S4 Luminescence decay curves for complexes 1-6 and 2,2'- H<sub>2</sub>dbpt.
